# Supplementary material for: Betatrophin Acts as a Diagnostic Biomarker in Type 2 Diabetes Mellitus and Is Negatively Associated with HDL-Cholesterol
Source: Hindawi journal article supplement (doi:10.1155/2015/479157), 2015-01-01
Supplement: f1 [file 479157.f1.xls]

## Sheet: raw data
Age	Gender	BMIsubgroups	Group	WHR	BMI	betatrophin	FINS	Cpeptide	FBG	quick	HomaIR	HomaB	TC	TG	HDLC	LDLC	ALT	AST
40	1	4	2	0.954023	24.23	1445.37	12.09	1.72	10.9	0.296285	5.85693	32.6757	4.48	2.39	-0.01	3.17	40	55
35	1	4	2	0.948718	20.9282	802.985	12.28	0.539	12.5	0.290581	6.82222	27.2889	4.93	1.28	0.55	3.52	21	17
41	1	4	2	1.01124	23.3	266.93	12.97	1.6	6.8	0.31243	3.91982	78.6061	5.12	1.49	1.08	3.52	36	24
35	2	4	2	0.863158	24.4	447.45	18.44	1.86	9.6	0.285445	7.86773	60.459	7.81	3.42	1.16	1.27	31	43
55	1	4	2	0.966292	24.84	992.435	10.09	0.75	8.5	0.313619	3.81178	40.36	5.62	1.51	0.66	3.55	52	27
31	1	4	2	0.920455	24.2	796.838	11	1.29	8.5	0.309973	4.15556	44	5.49	1.47	0.71	3.27	24	14
46	1	4	2	0.964286	24.0692	984.709	8.99	1.16	7.4	0.324858	2.95671	46.1026	5.16	1.08	0.71	3.92	17	29
30	2	4	2	0.902439	23.8286	503.482	11.63	-0.196	12.5	0.292589	6.46111	25.8444	6.56	1.01	0.77	4.86	13	18
43	2	4	2	0.952381	24.2306	564.249	10	1.64	11.5	0.301571	5.11111	25	3.47	0.47	0.81	1.99	29	20
57	1	4	2	0.945652	24.97	995.485	9	2.18	8.5	0.318579	3.4	36	5.69	1.69	0.81	4.15	19	17
33	1	4	2	0.953488	24.1073	747.117	10.84	1.08	9.5	0.305995	4.57689	36.1333	5.4	2.49	0.82	3.76	29	17
45	2	4	2	0.94382	24.03	1506.74	9.61	1.07	10.5	0.306825	4.48467	27.4571	4.35	0.63	0.84	2.61	11	19
57	1	4	2	0.939759	23.86	217.688	10.76	-0.636	11.5	0.298705	5.49956	26.9	5.38	1.64	1.44	3.85	21	14
30	1	4	2	0.952381	22.1327	472.821	11.47	-0.17	17.8	0.280485	9.07404	16.042	4.61	1.42	1.52	2.68	11	10
31	2	4	2	0.95	24.5761	458.62	10.99	1.77	9.9	0.303775	4.8356	34.3438	3.87	0.71	1.53	2.56	9	14
60	1	4	2	0.911111	24.3039	980.865	9.64	0.41	10.5	0.306698	4.49867	27.5429	5.01	0.51	1.07	3.11	31	21
36	2	4	2	0.782178	24.2	530.197	18.22	3.04	9.5	0.286242	7.69289	60.7333	5.96	1.06	1.16	3.71	19	15
60	2	4	2	0.905882	24	491.38	19.9	16.67	8.1	0.288799	7.164	86.5217	7.05	1.2	1.72	3.98	11	15
41	1	4	2	0.882353	24.202	1389.98	9.56	0.35	9.5	0.311192	4.03644	31.8667	8.17	1.16	1.36	4.67	17	19
58	2	4	2	0.8875	20.26	909.225	10.32	-0.03	13.5	0.294179	6.192	20.64	5.69	0.87	1.41	3.45	13	12
31	2	4	2	0.793651	24	567.4	28.9	8.58	8.4	0.274691	10.7893	117.959	4.04	1.67	1.44	1.96	19	21
33	2	4	2	0.815029	24.89	109.925	9.96	0.51	10.5	0.30537	4.648	28.4571	4.73	1	1.96	3.16	8	17
41	1	5	2	0.946237	28.6094	1076.83	16.75	2.3	11.8	0.281597	8.78444	40.3614	3.23	1.86	0.08	2.02	21	13
34	2	5	2	0.989247	28.8016	300.678	15.98	0.51	11.9	0.282934	8.45164	38.0476	4.39	0.97	1.13	3.23	28	18
34	2	5	2	0.907216	28.3	1038.44	17	2.72	14.7	0.273745	11.1067	30.3571	6.63	1.95	0.67	4.44	30	17
33	2	5	2	0.909574	26.38	510.135	16.22	2.03	8.8	0.293272	6.34382	61.2075	4.51	1.39	0.67	3.24	22	15
51	1	5	2	0.942529	26.5827	1018.96	16.92	2.58	7.5	0.297731	5.64	84.6	5.32	2.1	0.68	3.81	19	14
42	1	5	2	0.953488	27.1837	634.756	13.39	1.76	14.9	0.281275	8.86716	23.4912	5.29	1.11	0.73	3.83	20	18
29	1	5	2	0.927083	28.7676	1073.1	18.79	3.28	9.6	0.284781	8.01707	61.6066	5.78	3.09	0.74	3.51	14	10
45	1	5	2	0.963855	27.0518	915.649	14.37	2.18	12.7	0.284371	8.11107	31.2391	7.42	2.07	0.75	4.73	56	62
46	2	5	2	0.95122	28.6711	591.965	16.58	2.29	15	0.273901	11.0533	28.8348	4.99	1.62	0.76	3.8	13	19
33	1	5	2	0.943182	26.1367	982.855	16.77	2.26	14.3	0.275092	10.6583	31.0556	8.61	3.96	0.76	5.88	13	13
35	2	5	2	0.94186	25.4844	647.84	14.01	2.06	9.3	0.296719	5.7908	48.3103	5.56	1.02	0.79	4.08	19	21
42	2	5	2	0.912088	27.9	1077.3	16.59	2.46	7.9	0.296494	5.82493	75.4091	5.42	1.08	0.8	3.3	12	15
32	1	5	2	0.965116	27.6614	981.105	13.14	1.51	12.1	0.289297	7.0664	30.5581	5.95	2.16	0.81	4.51	10	9
31	1	5	2	0.933333	27.7	635.925	13.2	1.71	17.7	0.275952	10.384	18.5915	6.32	6.36	0.81	3.22	23	18
39	1	5	2	1.01099	29.5	1126.63	20.27	2.98	13.7	0.270355	12.3422	39.7451	5.69	1.69	0.81	4.15	17	18
38	1	5	2	0.946237	26.4082	824.22	12.12	0.93	19.1	0.276258	10.2885	15.5385	4.08	0.84	0.82	2.79	55	30
36	2	5	2	0.840909	27	561.425	16.63	2.4	5.5	0.310894	4.06511	166.3	3.81	1.69	0.82	1.69	28	23
36	1	5	2	0.955056	27.3355	884.926	18.41	2.54	9.3	0.286631	7.60947	63.4828	4.56	0.46	0.83	3.07	44	20
45	1	5	2	0.924731	28	540.09	15.39	1.63	9.6	0.291989	6.5664	50.459	4.64	0.97	0.88	3.31	32	25
36	2	5	2	0.928571	26.2063	1351.28	11	3.181	16.9	0.283724	8.26222	16.4179	4.33	1.32	0.94	2.52	15	16
36	2	5	2	0.955556	25.8724	1589.59	13.89	2.94	22.5	0.266655	13.89	14.6211	6.41	4.76	1.07	2.68	10	9
34	1	5	2	0.939227	29.34	197.84	18	0.84	12.5	0.277204	10	40	5.12	1.46	1.64	3.26	12	12
44	1	5	2	1.02353	26.5	581.905	13.6	11.9	16.3	0.277701	9.85244	21.25	4.06	1.1	1.15	2.41	16	10
43	2	5	2	0.957447	28.7249	629.496	15.84	2.69	15.6	0.274111	10.9824	26.1818	6.42	1.67	1.24	3.92	27	20
49	2	5	2	0.96	28.1633	616.68	13.22	0.87	12.7	0.287331	7.46196	28.7391	5.24	0.76	1.32	3.52	29	27
34	1	5	2	0.909574	26.5	633.025	16.22	2.03	8	0.296876	5.76711	72.0889	6.38	1.83	1.36	4.26	28	22
39	1	5	2	0.882682	26.39	646.705	16.51	2.41	17.1	0.269832	12.5476	24.2794	7.1	20.83	1.65	2.81	50	80
36	2	5	2	0.78125	25	548.415	22	9.45	7.4	0.28844	7.23556	112.821	5.94	0.78	1.68	3.99	10	15
46	2	5	2	0.953488	29.5859	630.93	15.39	1.63	10.3	0.289406	7.0452	45.2647	4.64	0.97	2.96	1.21	32	25
25	2	6	2	0.93617	30.6728	912.74	9.47	2.48	13.2	0.298312	5.55573	19.5258	3.41	1.78	0.23	2.4	34	17
18	1	6	2	1.01111	31.0416	737.825	9.16	1.58	15.8	0.292755	6.43236	14.8943	5.93	1.84	0.6	4.32	13	8
44	1	6	2	0.946237	32.4665	1565.8	13.56	3.16	13.1	0.285323	7.89493	28.25	3.51	2.34	0.66	2.03	67	53
76	2	6	2	0.955556	30.6389	1410.7	14.26	1.13	13.4	0.282766	8.49262	28.8081	4.93	1.82	0.73	3.15	12	9
42	1	6	2	0.924883	34.86	1068.39	16.77	0.74	17.3	0.268973	12.8943	24.3043	6.16	3.5	0.73	4.39	19	13
34	2	6	2	1.12299	32.7	246.685	14.12	3.29	13.7	0.28234	8.59751	27.6863	5.78	2.46	1.23	4.12	20	11
34	1	6	2	0.948454	34.9917	380.757	10.2	2.87	17.8	0.284552	8.06933	14.2657	5.44	2.44	1.24	3.64	37	20
33	2	6	2	0.963351	32	286.935	20.74	3.36	10.9	0.277046	10.0474	56.0541	3.86	1.34	1.24	2.35	17	23
52	2	6	2	0.932584	32.7619	1550.74	10.08	1.67	20.9	0.279417	9.3632	11.5862	6.32	1.66	0.76	4.41	23	21
47	2	6	2	0.867925	31.2	511.95	16.85	1.73	16.9	0.269559	12.6562	25.1493	5.59	3.43	0.76	3.77	27	20
35	1	6	2	0.944444	30.0276	1435.83	10.29	3.32	9.4	0.308564	4.29893	34.8814	4.6	1.36	0.76	2.77	22	14
38	1	6	2	0.830189	30.6097	1557.9	16.48	3.17	15.09	0.273904	11.0526	28.4383	6.27	3.72	0.77	4.05	122	51
41	2	6	2	0.828829	34.9	1426.84	75.54	15.25	9.3	0.243788	31.2232	260.483	5.43	2.16	0.83	3.72	16	14
45	1	6	2	0.963351	32	985.025	11.87	2.98	7	0.314978	3.69289	67.8286	6.07	5.47	0.87	2.01	39	19
46	1	6	2	0.918182	30.23	1200.45	16.22	3.55	12.1	0.28184	8.72276	37.7209	7.8	5.92	0.88	5.25	40	26
42	2	6	2	0.918367	31.1203	668.533	15.6	1.63	16.9	0.272014	11.7173	23.2836	5.8	2.03	0.89	4.23	14	17
55	2	6	2	0.854167	30.37	1409.12	12.84	2.7	7.8	0.307132	4.4512	59.7209	4.05	3.74	1.05	1.52	20	14
35	2	6	2	0.78673	30.64	527.31	11.75	2.16	7.3	0.313614	3.81222	61.8421	5.55	2.28	1.19	3.48	16	18
57	1	6	2	0.955446	31.97	1181.04	25.16	2.69	9.1	0.276623	10.1758	89.8571	6.28	2.37	1.22	4.31	28	24
55	2	6	2	0.948718	30.4855	1549.2	7.66	1.37	22	0.287198	7.48978	8.28108	6.72	1.18	1.26	3.76	22	19
51	2	6	2	0.924883	32	716.65	12.78	2.58	8.8	0.302454	4.9984	48.2264	7.03	1.6	1.34	5.27	39	25
43	1	6	2	0.959184	32.075	741.82	15.73	2.75	16.1	0.273312	11.2557	24.9683	6.18	6.8	1.35	2.78	52	24
54	2	1	1	0.893529	24.22	223.04	3.45	1.16	5.7	0.392316	0.874	31.3636	5	1.5	1.19	2.94	21	15
56	1	1	1	0.876818	24	20.44	6.63	2.2	5.7	0.353025	1.6796	60.2727	3.61	1.07	1.24	2.46	14	16
31	1	1	1	0.852609	23.2	180.81	3.76	0.44	5	0.395346	0.835556	50.1333	3.24	0.47	1.32	2.05	13	16
69	1	1	1	0.968876	23.2	79.935	2.09	1.32	5.5	0.43182	0.510889	20.9	5.06	0.82	1.48	3.62	11	20
35	1	1	1	0.845862	23.2	84.255	6.58	0.46	5.2	0.358487	1.52071	77.4118	4.77	0.89	1.61	3.32	150	73
34	2	1	1	0.792222	21.3	495.61	10.94	1.56	5.3	0.331283	2.57698	121.556	3.19	0.63	1.66	1.7	18	17
32	1	1	1	0.814318	20.5	424.755	4.19	0.49	5	0.38813	0.931111	55.8667	4.16	0.76	1.72	2.59	21	20
82	1	1	1	1.02556	24.32	88.18	10.09	1.94	5	0.338051	2.24222	134.533	5.78	1.66	1.73	4.09	15	21
48	2	1	1	0.956486	24.23	89.065	7.45	2.6	4	0.366369	1.32444	298	4.83	0.68	1.77	3.28	12	12
26	1	1	1	0.856164	19	181.095	2.96	0.51	4.4	0.421938	0.578844	65.7778	6.34	1.1	1.84	4.64	14	21
34	1	1	1	0.835823	20.5	148.595	7.03	0.91	4.4	0.364208	1.37476	156.222	4.78	0.65	2.09	2.91	18	22
31	2	1	1	0.808095	20.2	253.12	5.36	0.95	5.1	0.37147	1.21493	67	4.5	0.93	2.09	2.56	10	19
30	2	1	1	0.787391	23.3	20.965	4.58	0.43	4.6	0.387763	0.936356	83.2727	4.1	0.6	2.16	2.22	18	26
32	2	1	1	0.829563	23.4	85.495	7.87	0.84	4.6	0.355365	1.60898	143.091	4.99	0.66	2.28	2.95	8	18
35	2	1	1	0.811176	21.3	347.725	4.77	0.81	5.9	0.369735	1.2508	39.75	4.58	0.66	2.51	2.34	5	15
32	2	1	1	0.805632	21.5	28.825	4.77	0.82	5	0.379829	1.06	63.6	4.58	0.66	2.51	2.34	12	19
50	2	1	1	0.956486	24.38	31.06	4.76	0.92	4	0.394487	0.846222	190.4	5.42	0.45	2.7	2.96	12	16
51	2	1	1	0.86878	23.5	14.06	3.54	0.71	5.2	0.396781	0.818133	41.6471	5.46	0.74	3.15	2.61	15	23
26	1	2	1	0.916591	25.3	546.875	15	1.84	5.6	0.31451	3.73333	142.857	3.98	2.52	0.05	2.67	13	23
45	1	2	1	0.997374	27.8	312.28	9.8	1.53	5.4	0.335695	2.352	103.158	4.04	3.39	1.14	2.27	35	23
31	1	2	1	0.900769	27.6	570.64	13	1.45	5.6	0.32078	3.23556	123.81	4.89	1.67	0.61	3.6	94	43
35	1	2	1	0.980995	27.9	522.13	15.83	2.38	5.8	0.310735	4.08062	137.652	6.83	1.62	0.68	5.46	47	30
32	1	2	1	0.874124	25.6	390.065	7.27	1.47	5.1	0.35406	1.64787	90.875	5.28	3.76	1.24	3.33	24	25
33	2	2	1	0.87	27	511.01	15.76	2.11	6.3	0.307487	4.4128	112.571	4.27	1.6	0.75	2.87	33	26
63	1	2	1	0.930215	26.6	390.065	9.51	1.6	5.5	0.336268	2.32467	95.1	5.14	2.5	1.39	3.39	24	25
28	2	2	1	0.885789	25.5	645.7	15.76	1.91	6.3	0.307487	4.4128	112.571	1.53	4.99	0.95	3.48	7	14
41	2	2	1	0.871075	25.4	430.605	15.89	2.32	6.7	0.304649	4.73169	99.3125	1.53	4.99	1.45	3.48	14	20
33	1	2	1	0.85125	26.4	371.12	8.21	1.51	6	0.33924	2.18933	65.68	5.96	1.62	1.47	4.37	25	21
40	1	2	1	0.961192	26.9	442.46	8.25	2.23	5.8	0.340698	2.12667	71.7391	5.76	2.83	1.51	3.83	25	21
31	2	2	1	0.905106	26.7	369.025	7.98	1.37	5.3	0.347035	1.87973	88.6667	3.64	0.71	1.63	2.14	9	14
50	2	2	1	0.877018	25.2	1167.97	13	1.35	5.6	0.32078	3.23556	123.81	5.31	1.29	1.15	3.68	34	23
43	2	2	1	0.907321	28.7	1104.43	8.34	1.35	5.6	0.341924	2.07573	79.4286	5.31	1.29	1.15	3.68	11	18
30	2	2	1	0.854091	25.01	323.985	4.99	1.04	5.6	0.370156	1.24196	47.5238	3.73	1.29	1.69	1.95	27	27
33	2	2	1	0.891429	26.6	125.88	3.96	0.91	5.2	0.389261	0.9152	46.5882	6.34	1.1	1.84	4.64	47	26
39	1	2	1	0.875128	25.5	604.025	3.85	0.9	5.6	0.386261	0.958222	36.6667	3.27	0.68	1.37	1.51	17	20
26	1	2	1	0.872083	25.5	232.385	10	1.22	5.7	0.332099	2.53333	90.9091	5.11	0.71	2.03	3.24	20	22
32	1	2	1	0.85534	25.3	632.835	12.07	1.22	4.9	0.330341	2.62858	172.429	5.11	0.71	1.53	3.24	23	29
35	2	2	1	0.844725	25.23	614.25	6.36	1.35	5.9	0.353409	1.66773	53	4.5	0.93	1.59	2.56	17	20
52	1	2	1	0.912391	26.2	696.215	7.77	1.03	5.8	0.343746	2.00293	67.5652	6.59	1.19	1.61	4.36	19	21
53	2	2	1	0.919462	25.8	30.525	6.33	1.34	5.5	0.357521	1.54733	63.3	5.86	0.59	2.35	3.77	23	22
35	2	3	1	0.952353	30.6	447.725	27.91	3.1	6.1	0.281508	8.80716	155.056	5.22	6.44	0.93	2.44	27	23
32	1	3	1	0.904862	31.9	119.005	22.31	2.7	6.6	0.286978	7.53582	108.829	2.64	3.81	1.49	2.43	63	31
37	2	3	1	1.00782	30.1	1091.44	15.49	2.49	5.9	0.304491	4.75027	91.1176	5.65	4.99	0.66	3.53	59	35
36	2	3	1	0.942549	30	501.225	13.1	2.14	6	0.310787	4.07556	74.8571	5.85	3.9	0.71	3.74	59	37
35	1	3	1	1.0385	43.6	492.46	22.41	3.17	5.8	0.290313	6.8724	131.824	5.9	2.14	1.3	4.23	77	32
53	2	3	1	1.01536	30.5	482.065	6.26	1.52	5.9	0.345937	1.91973	36.8235	4.24	1.46	1.31	2.79	20	16
41	2	3	1	0.962857	30.9	342.87	15.5	2.92	5.9	0.303887	4.82222	88.5714	6.48	1.83	1.35	4.95	20	22
35	1	3	1	0.991569	31.3	207.255	20.44	2.9	5.7	0.290629	6.81333	102.2	2.54	5.47	1.44	3.67	37	23
32	1	3	1	0.956792	32.4	619.025	19.43	2.75	5.6	0.297328	5.69947	125.355	6.92	3.21	0.95	4.94	61	37
30	1	3	1	0.941287	30.6	672.57	14.9	1.5	6	0.305478	4.63556	85.1429	5.37	1.17	0.96	3.94	56	30
30	1	3	1	1.00122	35	501.225	19.08	2.47	6.1	0.295237	6.0208	106	6.41	2.04	0.97	4.9	19	26
73	2	3	1	1.005	30	480.605	12.52	2.64	6.9	0.305628	4.61849	52.1667	6.24	1.63	1.54	4.63	23	26
25	1	3	1	0.901633	30.3	721.505	8.76	1.89	5.6	0.33142	2.5696	56.5161	5.8	1.37	1.12	4.22	25	32
36	1	3	1	0.990635	30	482.065	7.98	1.37	6.5	0.336679	2.30533	53.2	3.64	0.71	1.63	2.14	45	28
33	2	3	1	0.928586	30.1	1107.45	20.44	2.84	6.4	0.291122	6.72249	104.821	4.56	0.67	1.17	2.99	14	19
43	1	3	1	0.961509	33.7	288.94	10.44	1.87	6.5	0.317558	3.48	52.2	6	1.76	1.7	4.15	40	25
37	1	3	1	1.00204	30.4	482.425	12.95	2.15	6.4	0.315768	3.626	92.5	5.82	0.99	1.92	3.99	55	36
51	1	3	1	0.946289	30.3	482.425	14.84	2.52	5	0.312026	3.95733	118.72	6.15	1.8	2.09	3.98	40	28
Footnote：	gender :1 represents male;2 represents female
	groups: 1 represents non diabetes subject; 2 represents T2DM subjects
	BMI subgroups :1 represents lean subject without daibetes;2 represents overweight subject without daibetes;3 reprensents obese subjects without daibetes;4 represents lean subject with T2DM;5 represents overweight subject with T2DM;6 reprensents obese subjects with T2DM
